# Supplementary material
Source: Springer Nature journal article supplement (https://www.springermedizin.de/resource/supplementary/13002_2013_385_MOESM7_ESM.pdf/9626878)

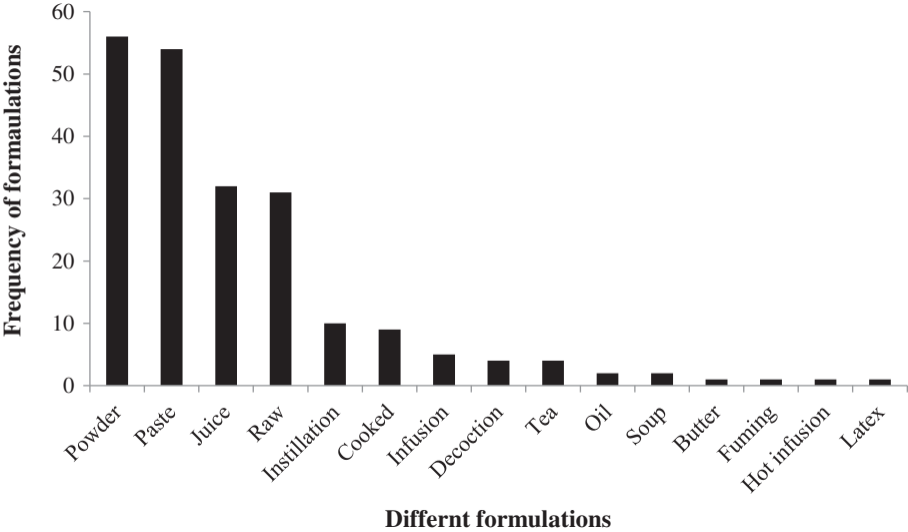

Supplement: MOESM7 [file 9626878]
